# Supplementary figures and images for: Cluster analysis of dietary patterns associated with colorectal cancer derived from a Moroccan case–control study
Source: HighWire-hosted journal article supplement (doi:10.1136/bmjhci-2022-100710), 2023-04-01

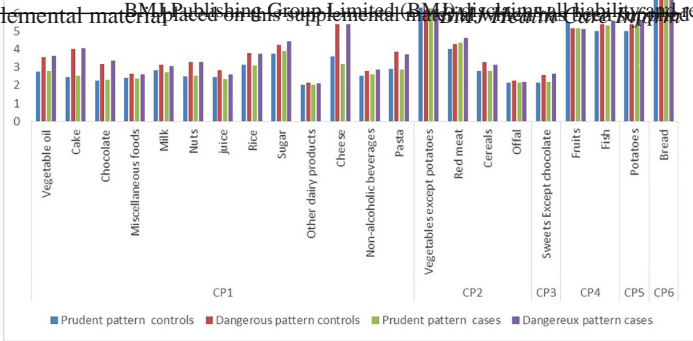

Supplement: bmjhci-2022-100710supp002_data_supplement.pdf [file bmjhci-2022-100710supp002_data_supplement.pdf]
